# Supplementary material for: Lifestyle and genetic risk of chronic liver disease in metabolically healthy and unhealthy individuals from the general population
Source: PubMed Central journal article supplement (PMC11268350; doi:10.1016/j.jhepr.2024.101105), 2024-04-26
Supplement: mmc1.pdf [file mmc1.pdf]

# **Lifestyle and genetic risk of chronic liver disease in metabolically healthy and unhealthy individuals from the general population**

Isabel Drake, Alice Giontella, Mariam Miari, Kristina Önnérhag, Marju Orho-Melander

Table of contents

|                                     |    |
|-------------------------------------|----|
| Supplementary Data Description..... | 2  |
| Supplementary Tables.....           | 5  |
| Supplementary References.....       | 17 |

## Supplementary Data Description

### Anthropometric, cardio-metabolic and blood measurements

At MDCS baseline examinations trained nurses measured height (m) and weight (kg) and body mass index (BMI) was calculated as weight divided by height squared ( $\text{kg}/\text{m}^2$ ). Waist circumference (cm) was measured midway between the lowest rib margin and iliac crest. Blood pressure (mmHg) was measured using a mercury-column sphygmomanometer after 5 min of supine rest. Hypertension was defined as blood pressure  $>130/85$  mmHg and/or use of anti-hypertensive medication(s). Prevalent diabetes mellitus at baseline was based on self-reported history of diabetes, diabetes diagnosis in national/local registries, current use of diabetes medications or fasting whole blood glucose of at least 6.1 mmol/l (corresponding to plasma glucose  $\geq 7.0$  mmol/L) at baseline examination.

All fasting blood samples were donated after an overnight fast and stored at  $-80^\circ\text{C}$ . Fasting glucose, fasting insulin, high-density lipoprotein (HDL, mmol/l), and triglycerides (mmol/l) were measured at the Department of Clinical Chemistry, Skåne University Hospital in Malmö, which is attached to a national standardization system. Low-density lipoprotein (LDL) was estimated using Friedewald's formula. Fasting glucose at baseline was measured in whole blood by a hexokinase-glucose-6-phosphate dehydrogenase method (1). A constant factor of 1.11 was used to convert concentration in whole blood to the equivalent concentration in plasma (2). Homeostatic Model Assessment – Insulin Resistance (HOMA-IR) was calculated according to Matthews et al. (3) by using the formula:  $(\text{fasting insulin} \times \text{fasting glucose})/22.5$ , where insulin is expressed as mIU/l and glucose as mmol/l (1). C-reactive protein (CRP) concentration using the high-sensitive C-reactive protein (hsCRP) test, was performed using the Tina-quant® CRP latex assay (Roche Diagnostics, Basel, Switzerland) on an ADVIA® 1650 Chemistry System (Bayer healthcare, NY, USA).

### Lifestyle variables

Age and sex were extracted from the participants' Swedish personal identification number. Educational level was categorized based on years and level of education completed i.e., less than 9 years or completed elementary school, middle school, high school or at least one year of studies at advanced level after high school but without degree, or university degree.

Smoking status was categorized as never, former or current (including irregular) based on self-reported use in the baseline questionnaire. Alcohol consumption was estimated based on information from both the baseline questionnaire and the reported intake during a 7-day food record that included detailed registration of cooked meals, medications, supplements and cold beverages (4). Non-consumers of alcohol (i.e., defined as those reporting no alcohol intake during the preceding year in the baseline questionnaire and reporting no intake during the 7-day registration) were classified as zero consumers while alcohol intake among consumers was categorized as low, moderate or high (i.e. <15, 15–30, or >30 g/day for women, and <20, 20–40, or >40 g/day for men). Level of leisure-time physical activity was assessed by participants reporting the number of minutes per week for seventeen different leisure-time activities and combined into a physical activity score (5). Participants were ranked from low to high leisure-time physical activity level by dividing them into sex-specific quartiles of total score.

Dietary intakes were assessed using a modified diet history method combining the 7-day food record with a 196-item semi-quantitative food questionnaire. Overall eating habits, quality of reported intakes in the food record and the questionnaire and potential overlap using the two modalities were further assessed using a 45-60 minutes dietary interview with a trained nutritionist (4). Reported food intake was used to calculate total dietary fiber intake using the food and nutrient data base from the Swedish National Food Agency (4). The reproducibility and validity of the diet assessment method has been described previously (6-8). We examined three previously proposed 'healthy' dietary components (dietary fiber, fruits and vegetables, and coffee) and two 'unhealthy' components (sugar-sweetened beverages and red and processed meat) dietary components. Dietary components examined were selected based on the previously reported directionally consistent associations with both liver-related outcomes and cardiometabolic diseases (9-12). Selection was further guided based on availability of data in the MDCS. Dietary intakes were energy-adjusted by calculating the relative intake in grams per 1000 kcal of estimated total energy intake.

## Supplementary Tables

**Table S1** ICD-codes and number of prevalent and incident first events of chronic liver disease (CLD) in the Malmö Diet and Cancer Study (N=30,446) identified in Swedish national registries including the inpatient register, hospital-based outpatient care and cause-of-death register. Only the first recorded event of the included endpoints is shown. Subjects with an incident diagnosis of chronic viral hepatitis and/or other specified cause of liver disease (n=82) were not included (ICD-10 B18, B19, E83-0, E83.1, K71, K74.3, K74.5, K75.2, K75.3, K75.4, K75.8, K75.9).

| Diagnosis                        | ICD-10 codes                                             | <i>n</i> <sub>incident</sub> | ICD-9 codes                     | <i>n</i> <sub>incident</sub> | <i>n</i> <sub>prevalent</sub> | Total <i>n</i> <sub>incident</sub><br>(ICD-9 + 10 codes) |
|----------------------------------|----------------------------------------------------------|------------------------------|---------------------------------|------------------------------|-------------------------------|----------------------------------------------------------|
| Acute and subacute liver failure | K72.0                                                    | 52                           | 570                             | 6                            | 4                             | 58                                                       |
| Chronic liver failure            | K72.1                                                    | 2                            | 572.8                           | 1                            | 0                             | 3                                                        |
| Liver failure                    | K72.9, K70.4,                                            | 116                          | -                               | -                            | -                             | 116                                                      |
| Cirrhosis                        | K74.6, K70.3,                                            | 112                          | 571.5                           | 7                            | 3                             | 119                                                      |
| Portal hypertension              | K76.6                                                    | 6                            | 572.3                           | 2                            | 0                             | 8                                                        |
| Hepatorenal syndrome             | K76.7                                                    | 3                            | 572.4                           | 2                            | 0                             | 5                                                        |
| Esophageal varices               | I85.0, I85.9                                             | 38                           | 456.0, 456.20,<br>456.1, 456.21 | 11                           | 10                            | 49                                                       |
| Ascites*                         | R18.9, TJA10                                             | 32                           | 789.5                           | 0                            | 3                             | 32                                                       |
| Liver encephalopathy             | -                                                        | -                            | 572.2                           | 0                            | 0                             | 1                                                        |
| Hepatocellular carcinoma         | C22.0                                                    | 48                           | 155                             | 12                           | 2                             | 75                                                       |
| Liver transplantation            | JJC00, JJC10,<br>JJC20, DJ005,<br>DJ006, JJC30,<br>JJC40 | 0                            | 5051, 5059                      | 0                            | 0                             | 0                                                        |
| <b>Total CLD</b>                 |                                                          | 410                          |                                 | 41                           | 22                            | 451***                                                   |

\* Only ascites cases with a subsequent additional diagnosis of CLD were included.

\*\* Of the total number of incident events, 82 cases (18.2%) were identified in the cause-of-death registry.

**Table S2** List of genetic variants and weights used to construct the weighted polygenic risk scores (PRS) for MASLD (PRS-MASLD), cALT (PRS-cALT), and liver cirrhosis (PRS-cirrhosis).

| PRS-MASLD     |                            |              |         |                     |
|---------------|----------------------------|--------------|---------|---------------------|
| Variant       | Gene                       | Minor allele | MAF     | Weight <sup>a</sup> |
| rs738408      | <i>PNPLA3</i>              | T            | 0.2098  | 32.721              |
| rs8107974     | <i>TM6SF2</i>              | T            | 0.1033  | 22.859              |
| rs2642442     | <i>MARC1</i>               | C            | 0.2987  | -7.930              |
| rs7029757     | <i>TOR1B</i>               | A            | 0.0902  | -6,409              |
| rs429358      | <i>APOE</i>                | C            | 0.1640  | -12,374             |
| rs10787429    | <i>GPAM</i>                | T            | 0.2838  | 8.656               |
| rs140201358   | <i>PNPLA2</i>              | G            | 0.0174  | 5.480               |
| rs62033400    | <i>FTO</i>                 | G            | 0.4104  | 5.493               |
| rs9303144     | <i>SREBF1</i>              | C            | 0.3001  | 5.675               |
| rs626283      | <i>TMC4/MBOAT7</i>         | C            | 0.4256  | 6.15                |
| rs8113542     | <i>INSR</i>                | G            | 0.2494  | 5.531               |
| rs79953491    | <i>COBLL1</i>              | G            | 0.1245  | -5.894              |
| rs4665972     | <i>GCKR</i>                | T            | 0.3713  | 10.681              |
| rs1229984     | <i>ADH1B</i>               | T            | 0.0215  | -6.538              |
| rs4423880*    | <i>MTTP</i>                | A            | 0.2576  | -6.615              |
| rs112875651   | <i>TRIB1</i>               | A            | 0.4002  | -9.344              |
|               |                            |              |         |                     |
| PRS-cirrhosis |                            |              |         |                     |
| Variant       | Gene                       | Minor allele | MAF     | Weight <sup>b</sup> |
| rs738409      | <i>PNPLA3</i>              | G            | 0.2098  | 0.4886              |
| rs58542926    | <i>TM6SF2</i>              | T            | 0.1028  | 0.3646              |
| rs2642438     | <i>MARC1</i>               | A            | 0.2749  | -0.0943             |
| rs7029757     | <i>TOR1B</i>               | A            | 0.0902  | -0.1625             |
| rs429358      | <i>APOE</i>                | C            | 0.1640  | -0.1625             |
| rs28929474    | <i>SERPINA1</i>            | T            | 0.0286  | 0.7080              |
| rs6834314     | <i>HSD17B13</i>            | G            | 0.3045  | -0.1625             |
| rs12904       | <i>EFNA1</i>               | A            | 0.4294  | -0.1054             |
| rs888655      | <i>ARHGEF28</i>            | A            | 0.2793  | -0.0726             |
| rs9398804     | <i>CENPW</i>               | A            | 0.4312  | -0.0726             |
| rs1006195**   | <i>HMBS</i>                | T            | 0.3829  | 0.2070              |
| rs1883711     | <i>MAFB</i>                | C            | 0.0662  | 0.1906              |
|               |                            |              |         |                     |
| PRS-cALT      |                            |              |         |                     |
| Variant       | Gene                       | Minor allele | MAF     | Weight <sup>c</sup> |
| rs738408      | <i>PNPLA3</i>              | T            | 0.2098  | 0.269               |
| rs2642438     | <i>MTARC1</i>              | A            | 0.2752  | -0.079              |
| rs6734238     | <i>IL1RN</i>               | G            | 0.395   | -0.059              |
| rs13389219    | <i>COBLL1; SCN2A</i>       | T            | 0.424   | -0.050              |
| rs17036160    | <i>PPARG</i>               | T            | 0.1423  | -0.073              |
| rs10433937    | <i>HSD17B13</i>            | G            | 0.3039  | -0.084              |
| rs17598226    | <i>MTTP</i>                | G            | 0.2583  | -0.041              |
| rs4841132     | <i>PPP1R3B</i>             | A            | 0.0947  | 0.130               |
| rs2980888     | <i>lnc-TRIB1; WASHC5</i>   | T            | 0.2696  | 0.139               |
| rs10883451    | <i>ERLIN1</i>              | C            | 0.4695  | -0.161              |
| rs4918722     | <i>GPAM</i>                | C            | 0.285   | 0.075               |
| rs28929474    | <i>SERPINA1</i>            | T            | 0.02876 | 0.481               |
| rs56094641    | <i>FTO</i>                 | G            | 0.4205  | 0.040               |
| rs1801689     | <i>APOH</i>                | C            | 0.02567 | 0.176               |
| rs11668950    | <i>IFI30;MPV17L2;PIK3R</i> | A            | 0.2247  | 0.041               |
| rs58542926    | <i>TM6SF2</i>              | T            | 0.1028  | 0.222               |

|        |                            |   |        |        |
|--------|----------------------------|---|--------|--------|
| rs5117 | <i>APOE</i> ; <i>APOC1</i> | C | 0.2422 | -0.080 |
|--------|----------------------------|---|--------|--------|

<sup>a</sup> Weights are the Z-scores from the GOLDPlus European ancestry meta-analysis presented in Chen et al. Nature Genetics 2023 (DOI: 10.1038/s41588-023-01497-6) (13). Negative weights were used if the reported risk-increasing allele was different from the minor allele.

<sup>b</sup> Weights are the natural log of odds ratios for liver cirrhosis from Emdin et al. Gastroenterology 2021 (DOI: 10.1053/j.gastro.2020.12.011) (14). Negative weights were used if the reported risk-increasing allele was different from the minor allele.

<sup>c</sup> Weights are the beta coefficients for unexplained chronically elevated ALT levels as a proxy for MASLD in Vojkovic et al. Nature Genetics 2022 (DOI: 10.1038/s41588-022-01078-z) (15). Negative weights were used if the reported risk-increasing allele was different from the minor allele.

\* Proxy variant for rs138764179 identified by Chen et al. (13)

\*\* Proxy variant for rs1799992 identified by Emdin et al. (14)

**Table S3** Cardiometabolic risk factors for chronic liver disease (CLD) in the Malmö Diet and Cancer Study (MDCS;  $n=27,991$ ) and the sub-sample with fasting blood samples taken at baseline ( $n=4,549$ ).

| Risk factor                          | Model*  | HR   | 95% CI    | <i>p</i> value        |
|--------------------------------------|---------|------|-----------|-----------------------|
| Prevalent diabetes mellitus (yes/no) | Model 1 | 2.53 | 1.79-3.57 | $1.4 \times 10^{-7}$  |
|                                      | Model 2 | 2.22 | 1.56-3.15 | $8.3 \times 10^{-6}$  |
| Hypertension (yes/no)                | Model 1 | 1.30 | 1.05-1.61 | $1.4 \times 10^{-2}$  |
|                                      | Model 2 | 1.15 | 0.92-1.43 | 0.21                  |
| Lipid-lowering drugs (yes/no)        | Model 1 | 1.23 | 0.74-2.04 | 0.42                  |
|                                      | Model 2 | 1.10 | 0.66-1.82 | 0.72                  |
| Body mass index, per SD increase     | Model 1 | 1.32 | 1.19-1.46 | $2.3 \times 10^{-7}$  |
|                                      | Model 2 | 1.26 | 1.13-1.40 | $2.6 \times 10^{-5}$  |
| Waist circumference, per SD increase | Model 1 | 1.59 | 1.40-1.81 | $4.6 \times 10^{-13}$ |
|                                      | Model 2 | 1.93 | 1.49-2.50 | $6.3 \times 10^{-7}$  |
| <i>Sub-sample only</i>               |         |      |           |                       |
| Fasting glucose, per SD increase     | Model 1 | 1.64 | 0.88-3.08 | 0.12                  |
|                                      | Model 2 | 1.43 | 0.74-2.74 | 0.29                  |
| HbA1c, per SD increase               | Model 1 | 1.14 | 0.72-1.80 | 0.58                  |
|                                      | Model 2 | 1.10 | 0.69-1.74 | 0.69                  |
| HOMA-IR, per SD increase             | Model 1 | 2.02 | 1.58-2.58 | $1.8 \times 10^{-8}$  |
|                                      | Model 2 | 2.11 | 1.62-2.75 | $2.8 \times 10^{-8}$  |
| LDL, per SD increase                 | Model 1 | 0.86 | 0.63-1.16 | 0.31                  |
|                                      | Model 2 | 0.83 | 0.61-1.13 | 0.23                  |
| HDL, per SD increase                 | Model 1 | 0.84 | 0.60-1.18 | 0.32                  |
|                                      | Model 2 | 0.91 | 0.64-1.30 | 0.61                  |
| Triglycerides, per SD increase       | Model 1 | 1.34 | 0.98-1.81 | 0.063                 |
|                                      | Model 2 | 1.26 | 0.91-1.73 | 0.17                  |
| hsCRP, per SD increase               | Model 1 | 1.35 | 1.01-1.82 | 0.046                 |
|                                      | Model 2 | 1.28 | 0.94-1.75 | 0.12                  |

\* Model 1 presents hazard ratios (HR) and 95% confidence intervals from a Cox proportional hazards regression model adjusting for age and sex. Model 2 includes adjustment for age, sex, prevalent diabetes mellitus, body mass index, hypertension and use of lipid-lowering drugs.

**Table S4** Multiplicative interaction terms between cardiometabolic, lifestyle and genetic risk factors on risk of chronic liver disease from a Cox proportional hazards regression model with adjustment for age, sex, and educational level. Nominally significant interaction terms (p<0.05) are marked in bold font.

| Risk factors                   | <i>PNPLA3</i> rs738409   | PRS-MASLD                | PRS-cirrhosis    | PRS-cALT         |
|--------------------------------|--------------------------|--------------------------|------------------|------------------|
| <b>Metabolic health status</b> | <b>0.85 (0.75-0.97)*</b> | 1.00 (0.92-1.08)         | 0.97 (0.90-1.04) | 1.00 (0.92-1.08) |
| Prevalent diabetes mellitus    | <b>0.54 (0.30-0.99)*</b> | 1.01 (0.73-1.40)         | 1.06 (0.77-1.45) | 1.25 (0.91-1.70) |
| Body mass index                | <b>0.81 (0.69-0.96)*</b> | 0.99 (0.89-1.10)         | 1.00 (0.91-1.09) | 1.02 (0.93-1.13) |
| Waist circumference            | 0.89 (0.76-1.05)         | 1.05 (0.94-1.16)         | 1.05 (0.95-1.16) | 1.05 (0.95-1.16) |
| Hypertension                   | 0.79 (0.57-1.08)         | 0.98 (0.79-1.20)         | 0.90 (0.74-1.09) | 0.96 (0.79-1.17) |
| Use of lipid-lowering drugs    | 0.84 (0.37-1.90)         | 0.86 (0.52-1.44)         | 0.83 (0.50-1.37) | 0.84 (0.51-1.39) |
|                                |                          |                          |                  |                  |
| <b>Lifestyle risk score</b>    | 1.06 (0.82-1.39)         | 1.07 (0.90-1.26)         | 0.94 (0.80-1.10) | 0.97 (0.82-1.14) |
| Smoking status                 | 1.15 (0.95-1.39)         | 1.09 (0.97-1.23)         | 1.01 (0.90-1.13) | 0.99 (0.89-1.11) |
| Alcohol consumption            | 1.09 (0.95-1.26)         | 1.02 (0.93-1.12)         | 1.02 (0.93-1.11) | 1.01 (0.93-1.11) |
| Physical activity              | 0.91 (0.79-1.04)         | 1.00 (0.91-1.09)         | 1.00 (0.92-1.09) | 0.95 (0.87-1.03) |
| Diet risk score                | 1.22 (0.92-1.62)         | <b>1.25 (1.04-1.49)*</b> | 1.05 (0.88-1.24) | 1.14 (0.96-1.36) |
| Dietary fiber                  | <b>0.83 (0.71-0.97)*</b> | 0.91 (0.82-1.00)         | 0.93 (0.85-1.03) | 1.01 (0.92-1.11) |
| Fruit and vegetables           | 0.92 (0.81-1.06)         | 0.98 (0.89-1.08)         | 1.00 (0.92-1.09) | 1.05 (0.96-1.14) |
| SSB                            | 1.00 (0.86-1.17)         | <b>1.12 (1.02-1.24)*</b> | 1.08 (0.98-1.19) | 1.08 (0.98-1.18) |
| Coffee                         | 0.98 (0.85-1.14)         | 0.98 (0.89-1.07)         | 1.00 (0.92-1.09) | 0.96 (0.88-1.05) |
| Red/processed meat             | 0.95 (0.80-1.13)         | 1.03 (0.92-1.15)         | 0.97 (0.87-1.08) | 1.01 (0.90-1.13) |



\*  $p < 0.05$

**Table S5** Effect of genetic risk variants (single nucleotide polymorphism; SNP) included in polygenic risk scores on risk of chronic liver disease (CLD) in the MDCS (N=26,965). Hazard ratios (HR) and 95% confidence intervals (CI) from a Cox proportional hazards regression model adjusting for age and sex.

| Gene               | SNP        | PRS             | Genotype          | HR (95% CI)       | p value                |
|--------------------|------------|-----------------|-------------------|-------------------|------------------------|
| <i>PNPLA3</i>      | rs738409   | Cirrhosis       | CC                | 1.00 (ref)        |                        |
|                    |            |                 | CG                | 1.20 (0.97-1.50)  | 0.099                  |
|                    |            |                 | GG                | 2.31 (1.61-3.32)  | 6.3 x 10 <sup>-6</sup> |
|                    |            |                 | Per allele effect | 1.38 (1.17-1.63)  | 1.0 x 10 <sup>-4</sup> |
| <i>PNPLA3</i>      | rs738408   | MASLD, cALT     | CC                | 1.00 (ref)        |                        |
|                    |            |                 | CT                | 1.20 (0.97-1.50)  | 0.099                  |
|                    |            |                 | TT                | 2.31 (1.61-3.32)  | 6.3 x 10 <sup>-6</sup> |
|                    |            |                 | Per allele effect | 1.38 (1.17-1.63)  | 1.0 x 10 <sup>-4</sup> |
| <i>TM6SF2</i>      | rs58542926 | Cirrhosis, cALT | CC                | 1.00 (ref)        |                        |
|                    |            |                 | CT                | 1.16 (0.90-1.49)  | 0.26                   |
|                    |            |                 | TT                | 3.19 (1.75-5.83)  | 1.6 x 10 <sup>-4</sup> |
|                    |            |                 | Per allele effect | 1.34 (1.08-1.66)  | 8.3 x 10 <sup>-3</sup> |
| <i>TM6SF2</i>      | rs8107974  | MASLD           | AA                | 1.00 (ref)        |                        |
|                    |            |                 | AT                | 1.15 (0.90-1.49)  | 0.27                   |
|                    |            |                 | TT                | 3.09 (1.69-5.64)  | 2.4 x 10 <sup>-4</sup> |
|                    |            |                 | Per allele effect | 1.33 (1.07-1.64)  | 9.7 x 10 <sup>-3</sup> |
| <i>GCKR</i>        | rs4665972  | MASLD           | CC                | 1.00 (ref)        |                        |
|                    |            |                 | CT                | 0.93 (0.75-1.15)  | 0.5                    |
|                    |            |                 | TT                | 0.82 (0.59-1.16)  | 0.26                   |
|                    |            |                 | Per allele effect | 0.91 (0.78-1.06)  | 0.25                   |
| <i>TMC4/MBOAT7</i> | rs626283   | MASLD           | GG                | 1.00 (ref)        |                        |
|                    |            |                 | GC                | 1.02 (0.81-1.29)  | 0.84                   |
|                    |            |                 | CC                | 1.15 (0.86-1.54)  | 0.34                   |
|                    |            |                 | Per allele effect | 1.07 (0.92-1.24)  | 0.38                   |
| <i>SERPINA1</i>    | rs28929474 | Cirrhosis, cALT | CC                | 1.00 (ref)        |                        |
|                    |            |                 | CT                | 1.71 (1.20-2.43)  | 2.9 x 10 <sup>-3</sup> |
|                    |            |                 | TT                | 9.51 (2.37-38.20) | 1.5 x 10 <sup>-3</sup> |
|                    |            |                 | Per allele effect | 1.85 (1.33-2.56)  | 2.6 x 10 <sup>-4</sup> |
| <i>HSD17B13</i>    | rs6834314  | Cirrhosis       | AA                | 1.00 (ref)        |                        |
|                    |            |                 | AG                | 0.85 (0.68-1.05)  | 0.13                   |
|                    |            |                 | GG                | 0.75 (0.51-1.11)  | 0.15                   |
|                    |            |                 | Per allele effect | 0.86 (0.73-1.01)  | 0.065                  |
| <i>HSD17B13</i>    | rs10433937 | cALT            | TT                | 1.00 (ref)        |                        |
|                    |            |                 | TG                | 0.84 (0.68-1.05)  | 0.13                   |

|                    |           |                     |                   |                  |                      |
|--------------------|-----------|---------------------|-------------------|------------------|----------------------|
|                    |           |                     | GG                | 0.73 (0.49-1.08) | 0.12                 |
|                    |           |                     | Per allele effect | 0.85 (0.72-1.00) | 0.049                |
| <i>MARC_1</i>      | rs2642438 | Cirrhosis, cALT     | GG                | 1.00 (ref)       |                      |
|                    |           |                     | GA                | 0.97 (0.78-1.20) | 0.79                 |
|                    |           |                     | AA                | 0.78 (0.51-1.21) | 0.27                 |
|                    |           |                     | Per allele effect | 0.93 (0.79-1.09) | 0.36                 |
| <i>MARC_1</i>      | rs2642442 | MASLD               | TT                | 1.00 (ref)       |                      |
|                    |           |                     | TC                | 0.92 (0.74-1.14) | 0.47                 |
|                    |           |                     | CC                | 0.83 (0.56-1.22) | 0.34                 |
|                    |           |                     | Per allele effect | 0.92 (0.78-1.07) | 0.28                 |
| <i>EFNA1</i>       | rs12904   | Cirrhosis           | GG                | 1.00 (ref)       |                      |
|                    |           |                     | GA                | 0.86 (0.69-1.08) | 0.2                  |
|                    |           |                     | AA                | 0.72 (0.52-0.98) | 0.036                |
|                    |           |                     | Per allele effect | 0.85 (0.73-0.99) | 0.031                |
| <i>ARHGEF28</i>    | rs888655  | Cirrhosis           | GG                | 1.00 (ref)       |                      |
|                    |           |                     | AG                | 0.92 (0.74-1.13) | 0.43                 |
|                    |           |                     | AA                | 0.51 (0.30-0.84) | $8.7 \times 10^{-3}$ |
|                    |           |                     | Per allele effect | 0.82 (0.69-0.97) | 0.021                |
| <i>CENPW</i>       | rs9398804 | Cirrhosis           | TT                | 1.00 (ref)       |                      |
|                    |           |                     | TA                | 1.17 (0.92-1.48) | 0.21                 |
|                    |           |                     | AA                | 1.12 (0.82-1.51) | 0.48                 |
|                    |           |                     | Per allele effect | 1.07 (0.92-1.24) | 0.38                 |
| <i>TOR1B</i>       | rs7029757 | MASLD               | GG                | 1.00 (ref)       |                      |
|                    |           |                     | GA                | 1.04 (0.79-1.36) | 0.8                  |
|                    |           |                     | AA                | 0.38 (0.05-2.73) | 0.34                 |
|                    |           |                     | Per allele effect | 0.98 (0.76-1.27) | 0.89                 |
| <i>HMBS</i>        | rs1006195 | Cirrhosis           | GG                | 1.00 (ref)       |                      |
|                    |           |                     | GT                | 1.17 (0.93-1.47) | 0.18                 |
|                    |           |                     | TT                | 1.35 (0.99-1.82) | 0.055                |
|                    |           |                     | Per allele effect | 1.16 (1.00-1.35) | 0.046                |
| <i>APOE</i>        | rs429358  | MASLD,<br>Cirrhosis | TT                | 1.00 (ref)       |                      |
|                    |           |                     | TC                | 0.88 (0.69-1.12) | 0.28                 |
|                    |           |                     | CC                | 1.03 (0.55-1.94) | 0.92                 |
|                    |           |                     | Per allele effect | 0.92 (0.75-1.13) | 0.42                 |
| <i>APOE; APOC1</i> | rs5117    | cALT                | TT                | 1.00 (ref)       |                      |
|                    |           |                     | TC                | 1.00 (0.81-1.25) | 0.91                 |
|                    |           |                     | CC                | 0.73 (0.44-1.22) | 0.23                 |
|                    |           |                     | Per allele effect | 0.94 (0.79-1.11) | 0.46                 |
| <i>APOH</i>        | rs1801689 | cALT                | AA                | 1.00 (ref)       |                      |

|                      |             |           |                   |                   |                        |
|----------------------|-------------|-----------|-------------------|-------------------|------------------------|
|                      |             |           | AC                | 1.32 (0.86-2.01)  | 0.2                    |
|                      |             |           | CC                | 8.41 (2.09-33.80) | 2.7 x 10 <sup>-3</sup> |
|                      |             |           | Per allele effect | 1.49 (1.02-2.19)  | 0.041                  |
| <i>MAFB</i>          | rs1883711   | Cirrhosis | GG                | 1.00 (ref)        |                        |
|                      |             |           | GC                | 0.78 (0.56-1.10)  | 0.16                   |
|                      |             |           | CC                | 0.58 (0.08-4.13)  | 0.59                   |
|                      |             |           | Per allele effect | 0.78 (0.57-1.08)  | 0.13                   |
| <i>GPAM</i>          | rs10787429  | MASLD     | CC                | 1.00 (ref)        |                        |
|                      |             |           | CT                | 1.13 (0.91-1.40)  | 0.26                   |
|                      |             |           | TT                | 1.04 (0.70-1.53)  | 0.86                   |
|                      |             |           | Per allele effect | 1.06 (0.91-1.24)  | 0.45                   |
| <i>GPAM</i>          | rs4918722   | cALT      | TT                | 1.00 (ref)        |                        |
|                      |             |           | TC                | 1.15 (0.92-1.42)  | 0.21                   |
|                      |             |           | CC                | 1.00 (0.67-1.48)  | 0.98                   |
|                      |             |           | Per allele effect | 1.06 (0.90-1.24)  | 0.49                   |
| <i>PNPLA2</i>        | rs140201358 | MASLD     | CC                | 1.00 (ref)        |                        |
|                      |             |           | CG/GG*            | 0.85 (0.47-1.55)  | 0.6                    |
|                      |             |           | Per allele effect | 0.85 (0.47-1.54)  | 0.59                   |
| <i>FTO</i>           | rs62033400  | MASLD     | AA                | 1.00 (ref)        |                        |
|                      |             |           | AG                | 1.08 (0.86-1.36)  | 0.5                    |
|                      |             |           | GG                | 1.08 (0.80-1.47)  | 0.61                   |
|                      |             |           | Per allele effect | 1.05 (0.90-1.21)  | 0.54                   |
| <i>FTO</i>           | rs56094641  | cALT      | AA                | 1.00 (ref)        |                        |
|                      |             |           | AG                | 1.08 (0.86-1.37)  | 0.5                    |
|                      |             |           | GG                | 1.08 (0.80-1.46)  | 0.62                   |
|                      |             |           | Per allele effect | 1.05 (0.90-1.21)  | 0.55                   |
| <i>SREBF1</i>        | rs9303144   | MASLD     | TT                | 1.00 (ref)        |                        |
|                      |             |           | TC                | 0.99 (0.80-1.23)  | 0.96                   |
|                      |             |           | CC                | 1.04 (0.72-1.51)  | 0.84                   |
|                      |             |           | Per allele effect | 1.01 (0.86-1.18)  | 0.91                   |
| <i>INSR</i>          | rs8113542   | MASLD     | AA                | 1.00 (ref)        |                        |
|                      |             |           | AG                | 1.06 (0.86-1.32)  | 0.58                   |
|                      |             |           | GG                | 0.92 (0.58-1.45)  | 0.71                   |
|                      |             |           | Per allele effect | 1.01 (0.86-1.20)  | 0.89                   |
| <i>COBLL1</i>        | rs79953491  | MASLD     | AA                | 1.00 (ref)        |                        |
|                      |             |           | AG                | 1.12 (0.88-1.43)  | 0.35                   |
|                      |             |           | GG                | 0.53 (0.17-1.66)  | 0.28                   |
|                      |             |           | Per allele effect | 1.03 (0.83-1.28)  | 0.78                   |
| <i>COBLL1; SCN2A</i> | rs13389219  | cALT      | CC                | 1.00 (ref)        |                        |

|                          |             |       |                   |                  |       |
|--------------------------|-------------|-------|-------------------|------------------|-------|
|                          |             |       | CT                | 0.94 (0.75-1.17) | 0.56  |
|                          |             |       | TT                | 0.81 (0.59-1.10) | 0.18  |
|                          |             |       | Per allele effect | 0.91 (0.78-1.05) | 0.19  |
| <i>ADH1B</i>             | rs1229984*  | MASLD | CC                | 1.00 (ref)       |       |
|                          |             |       | CT/TT             | 0.63 (0.33-1.23) | 0.17  |
|                          |             |       | Per allele effect | 0.63 (0.33-1.19) | 0.16  |
| <i>MTPP</i>              | rs4423880   | MASLD | GG                | 1.00 (ref)       |       |
|                          |             |       | GA                | 1.09 (0.88-1.35) | 0.45  |
|                          |             |       | AA                | 1.08 (0.71-1.63) | 0.73  |
|                          |             |       | Per allele effect | 1.06 (0.90-1.25) | 0.48  |
| <i>MTPP</i>              | rs17598226  | cALT  | CC                | 1.00 (ref)       |       |
|                          |             |       | CG                | 1.05 (0.85-1.31) | 0.64  |
|                          |             |       | GG                | 1.06 (0.70-1.61) | 0.78  |
|                          |             |       | Per allele effect | 1.04 (0.88-1.23) | 0.63  |
| <i>TRIB1</i>             | rs112875651 | MASLD | GG                | 1.00 (ref)       |       |
|                          |             |       | GA                | 1.11 (0.89-1.40) | 0.35  |
|                          |             |       | AA                | 0.97 (0.71-1.34) | 0.87  |
|                          |             |       | Per allele effect | 1.01 (0.87-1.17) | 0.88  |
| <i>IL1RN</i>             | rs6734238   | cALT  | AA                | 1.00 (ref)       |       |
|                          |             |       | AG                | 1.01 (0.80-1.27) | 0.95  |
|                          |             |       | GG                | 1.18 (0.87-1.59) | 0.28  |
|                          |             |       | Per allele effect | 1.07 (0.92-1.24) | 0.36  |
| <i>PPARG</i>             | rs17036160  | cALT  | CC                | 1.00 (ref)       |       |
|                          |             |       | CT                | 0.93 (0.73-1.19) | 0.58  |
|                          |             |       | TT                | 0.64 (0.26-1.55) | 0.33  |
|                          |             |       | Per allele effect | 0.90 (0.72-1.12) | 0.33  |
| <i>PPP1R3B</i>           | rs4841132   | cALT  | GG                | 1.00 (ref)       |       |
|                          |             |       | GA                | 1.02 (0.78-1.34) | 0.86  |
|                          |             |       | AA                | 1.15 (0.43-3.08) | 0.78  |
|                          |             |       | Per allele effect | 1.03 (0.81-1.32) | 0.79  |
| <i>Inc-TRIB1; WASHC5</i> | rs2980888   | cALT  | CC                | 1.00 (ref)       |       |
|                          |             |       | CT                | 1.22 (0.99-1.51) | 0.061 |
|                          |             |       | TT                | 0.60 (0.35-1.02) | 0.058 |
|                          |             |       | Per allele effect | 1.00 (0.85-1.17) | 0.96  |
| <i>ERLIN1</i>            | rs10883451  | cALT  | TT                | 1.00 (ref)       |       |
|                          |             |       | TC                | 0.89 (0.70-1.13) | 0.32  |
|                          |             |       | CC                | 0.90 (0.68-1.20) | 0.48  |
|                          |             |       | Per allele effect | 0.94 (0.82-1.09) | 0.44  |

|                            |            |      |                   |                  |      |
|----------------------------|------------|------|-------------------|------------------|------|
| <i>IFI30;MPV17L2;PIK3R</i> | rs11668950 | cALT | GG                | 1.00 (ref)       |      |
|                            |            |      | GA                | 1.10 (0.89-1.37) | 0.38 |
|                            |            |      | AA                | 1.00 (0.62-1.61) | 0.99 |
|                            |            |      | Per allele effect | 1.05 (0.89-1.25) | 0.55 |

\* Homozygous carriers of the minor allele were few and therefore heterozygous and homozygous carriers of the minor allele were collapsed into one category.

**Table S6** *PNPLA3* rs738409 genetic risk variant and polygenic risk scores (PRSs) for metabolic dysfunction-associated steatotic liver disease (MASLD), liver cirrhosis and unexplained chronic ALT elevation (cALT) in relation to incidence of chronic liver disease (CLD), steatotic liver disease (unspecified), liver cirrhosis (all-cause) and hepatocellular carcinoma (HCC) in the Malmö Diet and Cancer Study (N=26,965) stratified by age and sex. Hazard ratios (HR) and 95% confidence intervals (CI) per risk G-allele in *PNPLA3* rs738409 and per standard deviation increase in normalized (z-score) PRS-MASLD, PRS-cirrhosis and PRS-cALT.

|                               | CLD (n <sub>cases</sub> =365) |                         | Steatotic liver disease (n <sub>cases</sub> =76) |                        | Liver cirrhosis (n <sub>cases</sub> =173) |                         | HCC (n <sub>cases</sub> =72) |                         |
|-------------------------------|-------------------------------|-------------------------|--------------------------------------------------|------------------------|-------------------------------------------|-------------------------|------------------------------|-------------------------|
|                               | HR (95% CI)                   | p value                 | HR (95% CI)                                      | p value                | HR (95% CI)                               | p value                 | HR (95% CI)                  | p value                 |
| <b><i>PNPLA3</i> rs738409</b> |                               |                         |                                                  |                        |                                           |                         |                              |                         |
| All                           | 1.38 (1.17-1.62)              | 1.2 x 10 <sup>-4</sup>  | 1.39 (0.97-1.98)                                 | 0.073                  | 1.79 (1.43-2.24)                          | 3.5 x 10 <sup>-7</sup>  | 1.93 (1.37-2.72)             | 1.7 x 10 <sup>-4</sup>  |
| Men                           | 1.34 (1.08-1.66)              | 7.3 x 10 <sup>-3</sup>  | 1.57 (0.88-2.80)                                 | 0.13                   | 1.65 (1.24-2.20)                          | 5.8 x 10 <sup>-4</sup>  | 1.86 (1.22-2.83)             | 3.9 x 10 <sup>-3</sup>  |
| Women                         | 1.43 (1.11-1.84)              | 6.0 x 10 <sup>-3</sup>  | 1.29 (0.82-2.03)                                 | 0.27                   | 2.03 (1.41-2.91)                          | 1.2 x 10 <sup>-4</sup>  | 2.06 (1.14-3.71)             | 0.016                   |
| Age <60 years                 | 1.45 (1.17-1.79)              | 7.4 x 10 <sup>-4</sup>  | 1.72 (1.17-2.53)                                 | 0.0061                 | 2.05 (1.56-2.70)                          | 2.5 x 10 <sup>-7</sup>  | 1.95 (1.20-3.16)             | 6.6 x 10 <sup>-3</sup>  |
| Age ≥60 years                 | 1.31 (1.01-1.68)              | 0.038                   | 0.49 (0.17-1.37)                                 | 0.17                   | 1.38 (0.93-2.05)                          | 0.11                    | 1.94 (1.19-3.17)             | 7.9 x 10 <sup>-3</sup>  |
|                               |                               |                         |                                                  |                        |                                           |                         |                              |                         |
| <b>PRS-MASLD</b>              |                               |                         |                                                  |                        |                                           |                         |                              |                         |
| All                           | 1.23 (1.11-1.35)              | 5.6 x 10 <sup>-5</sup>  | 1.25 (1.01-1.55)                                 | 0.043                  | 1.45 (1.26-1.67)                          | 1.5 x 10 <sup>-7</sup>  | 1.52 (1.24-1.90)             | 1.0 x 10 <sup>-4</sup>  |
| Men                           | 1.24 (1.10-1.41)              | 8.0 x 10 <sup>-4</sup>  | 1.23 (0.86-1.77)                                 | 0.26                   | 1.40 (1.17-1.67)                          | 1.9 x 10 <sup>-4</sup>  | 1.66 (1.28-2.15)             | 1.2 x 10 <sup>-4</sup>  |
| Women                         | 1.20 (1.03-1.40)              | 2.1 x 10 <sup>-2</sup>  | 1.26 (0.96-1.65)                                 | 0.094                  | 1.55 (1.24-1.95)                          | 1.6 x 10 <sup>-4</sup>  | 1.28 (0.87-1.89)             | 0.20                    |
| Age <60 years                 | 1.29 (1.13-1.47)              | 1.5 x 10 <sup>-4</sup>  | 1.48 (1.16-1.88)                                 | 0.0013                 | 1.62 (1.36-1.92)                          | 4.3 x 10 <sup>-8</sup>  | 1.51 (1.11-2.04)             | 8.3 x 10 <sup>-3</sup>  |
| Age ≥60 years                 | 1.15 (0.99-1.34)              | 0.064                   | 0.65 (0.39-1.09)                                 | 0.10                   | 1.20 (0.94-1.52)                          | 0.14                    | 1.56 (1.15-2.12)             | 3.8 x 10 <sup>-3</sup>  |
|                               |                               |                         |                                                  |                        |                                           |                         |                              |                         |
| <b>PRS-cirrhosis</b>          |                               |                         |                                                  |                        |                                           |                         |                              |                         |
| All                           | 1.36 (1.24-1.50)              | 8.9 x 10 <sup>-11</sup> | 1.38 (1.13-1.70)                                 | 1.8 x 10 <sup>-3</sup> | 1.65 (1.45-1.87)                          | 1.5 x 10 <sup>-14</sup> | 1.80 (1.49-2.18)             | 1.9 x 10 <sup>-9</sup>  |
| Men                           | 1.42 (1.26-1.60)              | 9.3x 10 <sup>-9</sup>   | 1.14 (0.79-1.64)                                 | 0.47                   | 1.64 (1.39-1.92)                          | 1.5 x 10 <sup>-9</sup>  | 2.06 (1.65-2.56)             | 1.0 x 10 <sup>-10</sup> |
| Women                         | 1.28 (1.10-1.49)              | 1.2 x 10 <sup>-3</sup>  | 1.53 (1.19-1.95)                                 | 7.8 x 10 <sup>-4</sup> | 1.66 (1.35-2.05)                          | 2.0 x 10 <sup>-6</sup>  | 1.28 (0.88-1.86)             | 0.20                    |
| Age <60 years                 | 1.38 (1.22-1.56)              | 3.8 x 10 <sup>-7</sup>  | 1.53 (1.22-1.91)                                 | 2.4 x 10 <sup>-4</sup> | 1.72 (1.47-2.01)                          | 1.1 x 10 <sup>-11</sup> | 1.97 (1.52-2.54)             | 2.7 x 10 <sup>-7</sup>  |
| Age ≥60 years                 | 1.34 (1.16-1.55)              | 4.8 x 10 <sup>-5</sup>  | 0.96 (0.60-1.54)                                 | 0.88                   | 1.53 (1.23-1.90)                          | 1.4 x 10 <sup>-4</sup>  | 1.63 (1.23-2.17)             | 7.2 x 10 <sup>-4</sup>  |
|                               |                               |                         |                                                  |                        |                                           |                         |                              |                         |
| <b>PRS-cALT</b>               |                               |                         |                                                  |                        |                                           |                         |                              |                         |
| All                           | 1.34 (1.21-1.47)              | 2.9 x 10 <sup>-9</sup>  | 1.11 (0.89-1.38)                                 | 0.35                   | 1.54 (1.35-1.76)                          | 2.1 x 10 <sup>-10</sup> | 1.59 (1.29-1.95)             | 9.8 x 10 <sup>-6</sup>  |

|                     |                  |                      |                  |      |                  |                      |                  |                      |
|---------------------|------------------|----------------------|------------------|------|------------------|----------------------|------------------|----------------------|
| Men                 | 1.38 (1.22-1.56) | $3.3 \times 10^{-7}$ | 0.98 (0.67-1.43) | 0.91 | 1.59 (1.35-1.88) | $5.0 \times 10^{-8}$ | 1.77 (1.39-2.26) | $4.6 \times 10^{-6}$ |
| Women               | 1.26 (1.08-1.47) | $2.5 \times 10^{-3}$ | 1.19 (0.91-1.55) | 0.21 | 1.44 (1.15-1.80) | $1.4 \times 10^{-3}$ | 1.23 (0.84-1.80) | 0.28                 |
| Age <60 years       | 1.36 (1.20-1.55) | $2.3 \times 10^{-6}$ | 1.13 (0.88-1.45) | 0.34 | 1.56 (1.32-1.84) | $2.1 \times 10^{-7}$ | 1.80 (1.36-2.38) | $3.7 \times 10^{-5}$ |
| Age $\geq$ 60 years | 1.30 (1.13-1.50) | $2.9 \times 10^{-4}$ | 1.06 (0.67-1.65) | 0.81 | 1.52 (1.22-1.89) | $2.2 \times 10^{-4}$ | 1.39 (1.03-1.87) | 0.031                |



## Supplementary References

1. Hedblad B, Nilsson P, Janzon L, Berglund G. Relation between insulin resistance and carotid intima-media thickness and stenosis in non-diabetic subjects. Results from a cross-sectional study in Malmo, Sweden. *Diabet Med.* 2000;17(4):299-307.
2. D'Orazio P, Burnett RW, Fogh-Andersen N, Jacobs E, Kuwa K, Kulpmann WR, et al. Approved IFCC recommendation on reporting results for blood glucose: International Federation of Clinical Chemistry and Laboratory Medicine Scientific Division, Working Group on Selective Electrodes and Point-of-Care Testing (IFCC-SD-WG-SEPOCT). *Clin Chem Lab Med.* 2006;44(12):1486-90.
3. Matthews DR, Hosker JP, Rudenski AS, Naylor BA, Treacher DF, Turner RC. Homeostasis model assessment: insulin resistance and beta-cell function from fasting plasma glucose and insulin concentrations in man. *Diabetologia.* 1985;28(7):412-9.
4. Wirfalt E, Mattisson I, Johansson U, Gullberg B, Wallstrom P, Berglund G. A methodological report from the Malmo Diet and Cancer study: development and evaluation of altered routines in dietary data processing. *Nutr J.* 2002;1:3.
5. Mattisson I, Wirfalt E, Aronsson CA, Wallstrom P, Sonestedt E, Gullberg B, et al. Misreporting of energy: prevalence, characteristics of misreporters and influence on observed risk estimates in the Malmo Diet and Cancer cohort. *Br J Nutr.* 2005;94(5):832-42.
6. Elmstahl S, Gullberg B, Riboli E, Saracci R, Lindgarde F. The Malmo Food Study: the reproducibility of a novel diet history method and an extensive food frequency questionnaire. *Eur J Clin Nutr.* 1996;50(3):134-42.
7. Elmstahl S, Riboli E, Lindgarde F, Gullberg B, Saracci R. The Malmo Food Study: the relative validity of a modified diet history method and an extensive food frequency questionnaire for measuring food intake. *Eur J Clin Nutr.* 1996;50(3):143-51.
8. Riboli E, Elmstahl S, Saracci R, Gullberg B, Lindgarde F. The Malmo Food Study: validity of two dietary assessment methods for measuring nutrient intake. *Int J Epidemiol.* 1997;26 Suppl 1:S161-73.

9. Hassani Zadeh S, Mansoori A, Hosseinzadeh M. Relationship between dietary patterns and non-alcoholic fatty liver disease: A systematic review and meta-analysis. *J Gastroenterol Hepatol* 2021; 36(6):1470-1478.
10. Kennedy OJ, Fallowfield JA, Poole R, Hayes PC, Parkes J, Roderick PJ. All coffee types decrease the risk of adverse clinical outcomes in chronic liver disease: a UK Biobank study. *BMC Public Health*. 2021; 21(1): 970.
11. Carlström M, Larsson SC. Coffee consumption and reduced risk of developing type 2 diabetes: a systematic review with meta-analysis. *Nutr Rev*. 2018; 76(6):395-417.
12. Miller V, Micha R, Choi E, Karageorgou D, Webb P, Mozaffarian D. Evaluation of the Quality of Evidence of the Association of Foods and Nutrients With Cardiovascular Disease and Diabetes: A Systematic Review. *JAMA Netw Open*. 2022; 5(2):e2146705.
13. Chen Y, Du X, Kuppaa A, Feitosa MF, Bielak LF, O'Connell JR, et al. Genome-wide association meta-analysis identifies 17 loci associated with nonalcoholic fatty liver disease. *Nat Genet*. 2023; 55(10):1640-1650.
14. Emdin CA, Haas M, Ajmera V, Simon TG, Homburger J, Neben C, et al. Association of Genetic Variation With Cirrhosis: A Multi-Trait Genome-Wide Association and Gene-Environment Interaction Study. *Gastroenterology*. 2021;160(5):1620-33 e13.
15. Vujkovic M, Ramdas S, Lorenz KM, Guo X, Darlay R, Cordell HJ, et al. A multiancestry genome-wide association study of unexplained chronic ALT elevation as a proxy for nonalcoholic fatty liver disease with histological and radiological validation. *Nat Genet*. 2022; 54(6):761-771.
